# Supplementary material for: Efficacy and safety of non-vitamin K antagonist oral anticoagulants compared with warfarin in patients with atrial fibrillation
Source: PubMed Central journal article supplement — Open Heart. 2017 Sep 23;4(2):e000682. doi: 10.1136/openhrt-2017-000682 (PMC5623334; doi:10.1136/openhrt-2017-000682), 2017-09-23
Supplement: openhrt-2017-000682supp001.pdf [file openhrt-2017-000682supp001.pdf]

SUPPLEMENTAL DATA

**Efficacy and Safety of Non-Vitamin K Antagonist Oral Anticoagulants Compared with Warfarin at its Best in Patients with Atrial Fibrillation**

Friberg and Oldgren

| Item                   | Description                                  | Page |
|------------------------|----------------------------------------------|------|
| <b>Suppl. Table 1.</b> | Definitions of medical history               | 2    |
| <b>Suppl. Table 2.</b> | ICD-10 codes used to identify outcome events | 4    |

**Supplemental Table 1.** Definitions of medical history

| Covariate                      | ICD-10 or procedure code beginning with                                                                                                        |
|--------------------------------|------------------------------------------------------------------------------------------------------------------------------------------------|
| Intracranial bleed             | I60-62, S064-066 , I690-692                                                                                                                    |
| Gastrointestinal bleed         | I850, I983, K226, K250, K252, K254, K256, K260, K262, K264, K266, K270, K272, K274, K276, K280, K284, K286, K290, K625, K661, K920, K921, K922 |
| Urogenital bleed               | N02, R319, N95                                                                                                                                 |
| Other bleed                    | H431, R04, R58, D629, procedure code DR029                                                                                                     |
| Ischaemic stroke               | I63, I693                                                                                                                                      |
| Unspecified stroke             | I64, I694                                                                                                                                      |
| Systemic emboli                | I74                                                                                                                                            |
| TIA                            | G45                                                                                                                                            |
| Thromboembolism                | I63-64, I693-694, I74, G45                                                                                                                     |
| Anaemia                        | D50-64                                                                                                                                         |
| Coagulation or platelet defect | D65-69                                                                                                                                         |
| Renal failure                  | N18-19, procedure codes DR016, DR024, KAS00, KAS10, KAS20                                                                                      |
| Liver disease                  | K70-77, procedure codes JJB, JJC                                                                                                               |
| Heart failure                  | I50, I110, I130, I132, I255, K761, I42-43                                                                                                      |
| Hypertension                   | I10-15                                                                                                                                         |
| Diabetes                       | E10-14 or use of antidiabetic drug (ATC codes beginning with A10)                                                                              |
| Vascular disease               | I21, I22, I252, I70-73 (as in CHA <sub>2</sub> DS <sub>2</sub> -VASc)                                                                          |
| Mitral stenosis                | I342, I050, I052, Q232                                                                                                                         |
| Mechanical heart valve         | Z952                                                                                                                                           |
| Other valvular disease         | I34-39, I05-08, Q22-23 except valvular atrial fibrillation                                                                                     |
| Pacemaker or ICD               | Z950, Z450, procedure code FPE                                                                                                                 |
| Hypothyroidism                 | E00-03 , E890                                                                                                                                  |
| Thyrotoxicosis                 | E05 within preceding year                                                                                                                      |

|                                              |                                                                                                                                                                |
|----------------------------------------------|----------------------------------------------------------------------------------------------------------------------------------------------------------------|
| COPD                                         | J43-44                                                                                                                                                         |
| Asthma                                       | J45-46                                                                                                                                                         |
| Cancer                                       | Chapter C except C44 (basalioma) within preceding 3 years                                                                                                      |
| Alcohol index <sup>a</sup>                   | E244, F10, G312, G621, G721, I426, K292, K70, K860, O354, P043, Q860, T51, Y90-91, Z502, Z714                                                                  |
| Dementia                                     | F00-03, F051, G300-301, G308-309                                                                                                                               |
| Frequent faller                              | ≥2 hospitalisations with diagnosis W00-19 or R296                                                                                                              |
| CHA <sub>2</sub> DS <sub>2</sub> -VASc score | 1 point each for: heart failure, hypertension, age 65-74 years, diabetes, vascular disease, female sex and 2 points each for age ≥75 years and thromboembolism |

<sup>a</sup>A set of codes used by the Swedish Board of Health and Welfare for annual reporting alcohol related mortality in the population.

TIA, transient ischemic attack; ICD, implantable cardioverter defibrillator; COPD, chronic obstructive pulmonary disease

**Supplemental Table 2.** ICD-10 codes used to identify outcome events

| Code         | Meaning                                                   |                     |                           |                |
|--------------|-----------------------------------------------------------|---------------------|---------------------------|----------------|
| I60          | Subarachnoid haemorrhage                                  | Haemorrhagic stroke | Intracranial bleeding     | Major bleeding |
| I61          | Intracerebral haemorrhage                                 |                     |                           |                |
| I62          | Sub- and epidural haemorrhages                            |                     |                           |                |
| S064         | Traumatic epidural haemorrhages                           |                     |                           |                |
| S065         | Traumatic subdural haemorrhages                           |                     |                           |                |
| S066         | Traumatic subarachnoid haemorrhages                       |                     |                           |                |
| K226         | Gastro-oesophageal laceration-haemorrhage syndrome        |                     | Gastrointestinal bleeding |                |
| K25          | Bleeding gastric ulcer (subcodes 0,2,4,6 only)            |                     |                           |                |
| K26          | Bleeding duodenal ulcer (subcodes 0,2,4,6 only)           |                     |                           |                |
| K27          | Bleeding peptic ulcer unspecified (subcodes 0,2,4,6 only) |                     |                           |                |
| K28          | Bleeding gastrojejunal ulcer (subcodes 0,2,4,6 only)      |                     |                           |                |
| K290         | Acute haemorrhagic gastritis                              |                     |                           |                |
| K625         | Haemorrhage of anus and rectum                            |                     |                           |                |
| K661         | Haemoperitoneum                                           |                     |                           |                |
| K920-K922    | Haematemesis, melena and unspecified GI bleeding          |                     |                           |                |
| I850<br>I983 | Oesophageal varices with bleeding                         |                     |                           |                |
| N02          | Haematuria                                                |                     | Other bleeding            |                |
| R319         | Haematuria, unspecified                                   |                     |                           |                |
| N939         | Abnormal uterine and vaginal bleeding                     |                     |                           |                |
| N950         | Postmenopausal bleed                                      |                     |                           |                |
| N501A        | Haemorrhage in male genital organ                         |                     |                           |                |
| H113         | Conjunctival haemorrhage                                  |                     |                           |                |
| H313         | Choroidal haemorrhage                                     |                     |                           |                |
| H356         | Retinal haemorrhage                                       |                     |                           |                |
| H431         | Vitreous haemorrhage                                      |                     |                           |                |
| H450         | Vitreous haemorrhage in diseases classified elsewhere     |                     |                           |                |
| H922         | Ear bleeding                                              |                     |                           |                |
| I312         | Haemopericardium                                          |                     |                           |                |

|                         |                                                                             |  |  |
|-------------------------|-----------------------------------------------------------------------------|--|--|
| J942                    | Haemothorax                                                                 |  |  |
| M250                    | Haemarthrosis                                                               |  |  |
| R04                     | Nosebleed                                                                   |  |  |
| R58                     | Haemorrhage not elsewhere classified                                        |  |  |
| T810                    | Haemorrhage and haematoma complicating a procedure not elsewhere classified |  |  |
| D500                    | Iron deficiency anaemia secondary to blood loss (chronic)                   |  |  |
| D629                    | Anaemia after acute major bleeding                                          |  |  |
| DR029<br>DR033 Z513     | Procedure codes for transfusion                                             |  |  |
| I63                     | Ischaemic stroke                                                            |  |  |
| I64                     | Unspecified stroke                                                          |  |  |
| I74                     | Systemic embolism                                                           |  |  |
| I60-61<br>I63-64<br>I74 | All-cause stroke or systemic embolism                                       |  |  |
| I21-22                  | Myocardial infarction                                                       |  |  |
